# Supplementary material for: Self-tracking in solvent-free, low-dimensional polymer electrolyte blends with lithium salts giving high ambient DC conductivity
Source: Royal Society of Chemistry journal article supplement (doi:10.1039/b004174m), 2000-01-01
Supplement: b004174m.doc [file b004174m.doc]

(a)

(b)

**Figure 1** Structural models of C16O5 : **II** : LiClO4. (a) Schematic diagram. Solid lines: C16O5, dashed lines: polymer **II**. (b) Molecular dynamics model of the end-view of the helices. Red spheres: oxygens, green spheres: lithium ions, purple spheres: anions, small grey spheres are carbons and hydrogens. The experimental *d* spacing (40 Ǻ) was applied as a constraint to the molecular dynamics model. Note that in the schematic of Figure 1(a) two chain folds and additional ions associated with polymer **II** are shown which have not been included in Figure 1(b).
